# Supplementary material for: SARS-CoV-2 variants show resistance to neutralization by many monoclonal and serum-derived polyclonal antibodies
Source: Res Sq. 2021 Feb 10:rs.3.rs-228079. Preprint. [Version 1] doi: 10.21203/rs.3.rs-228079/v1 (PMC7885928; doi:10.21203/rs.3.rs-228079/v1)
Supplement: Supplement [file 643a22448abfd8bacc38202a.xlsx]

## Sheet: N676_I8558_P1-SARS-CoV-2-del69-
POS	REF	ALT	EFFECT	GENE	VAF	PROTEIN	filename
7486	A	T	synonymous_variant	ORF1ab	1	p.Ser2407Ser
7489	T	A	synonymous_variant	ORF1ab	0.988827	p.Thr2408Thr
8782	C	T	synonymous_variant	ORF1ab	0.992806	p.Ser2839Ser
21764	ATACATG	A	disruptive_inframe_deletion	S	0.944751	p.His69_Val70del
23063	A	T	missense_variant	S	1	p.Asn501Tyr
23403	A	G	missense_variant	S	1	p.Asp614Gly
28144	T	C	missense_variant	ORF8	1	p.Leu84Ser
							N676_I8558_P1-SARS-CoV-2-del69-70_plus_N501Y_plus_D614G_TruSeq-AD003_TTAGGC_S12

## Sheet: N676_I8554_P1-SARS-CoV-2-D614G_
POS	REF	ALT	EFFECT	GENE	VAF	PROTEIN	filename
7486	A	T	synonymous_variant	ORF1ab	1	p.Ser2407Ser
7489	T	A	synonymous_variant	ORF1ab	0.981366	p.Thr2408Thr
8782	C	T	synonymous_variant	ORF1ab	0.989899	p.Ser2839Ser
23403	A	G	missense_variant	S	1	p.Asp614Gly
28144	T	C	missense_variant	ORF8	0.996198	p.Leu84Ser
							N676_I8554_P1-SARS-CoV-2-D614G_TruSeq-AD015_ATGTCA_S8

## Sheet: N676_I8557_P1-SARS-CoV-2-P681H_
POS	REF	ALT	EFFECT	GENE	VAF	PROTEIN	filename
7486	A	T	synonymous_variant	ORF1ab	0.993631	p.Ser2407Ser
7489	T	A	synonymous_variant	ORF1ab	0.987261	p.Thr2408Thr
8782	C	T	synonymous_variant	ORF1ab	0.996226	p.Ser2839Ser
23403	A	G	missense_variant	S	0.995098	p.Asp614Gly
23604	C	A	missense_variant	S	0.995951	p.Pro681His
28144	T	C	missense_variant	ORF8	0.988971	p.Leu84Ser
							N676_I8557_P1-SARS-CoV-2-P681H_plus_D614G_TruSeq-AD001_ATCACG_S11

## Sheet: N676_I8548_P0-SARS-CoV-2-D614G_
POS	REF	ALT	EFFECT	GENE	VAF	PROTEIN	filename
7486	A	T	synonymous_variant	ORF1ab	1	p.Ser2407Ser
7489	T	A	synonymous_variant	ORF1ab	0.984615	p.Thr2408Thr
8782	C	T	synonymous_variant	ORF1ab	0.991071	p.Ser2839Ser
23403	A	G	missense_variant	S	1	p.Asp614Gly
28144	T	C	missense_variant	ORF8	1	p.Leu84Ser
							N676_I8548_P0-SARS-CoV-2-D614G_TruSeq-AD002_CGATGT_S2

## Sheet: N676_I8550_P0-SARS-CoV-2-E484K_
POS	REF	ALT	EFFECT	GENE	VAF	PROTEIN	filename
7486	A	T	synonymous_variant	ORF1ab	0.993151	p.Ser2407Ser
7489	T	A	synonymous_variant	ORF1ab	0.959732	p.Thr2408Thr
8782	C	T	synonymous_variant	ORF1ab	0.996416	p.Ser2839Ser
23012	G	A	missense_variant	S	0.993333	p.Glu484Lys
23403	A	G	missense_variant	S	1	p.Asp614Gly
28144	T	C	missense_variant	ORF8	0.988506	p.Leu84Ser
							N676_I8550_P0-SARS-CoV-2-E484K_plus_D614G_TruSeq-AD005_ACAGTG_S4

## Sheet: N676_I8555_P1-SARS-CoV-2-E484K_
POS	REF	ALT	EFFECT	GENE	VAF	PROTEIN	filename
7486	A	T	synonymous_variant	ORF1ab	1	p.Ser2407Ser
7489	T	A	synonymous_variant	ORF1ab	0.993939	p.Thr2408Thr
8782	C	T	synonymous_variant	ORF1ab	0.98893	p.Ser2839Ser
23012	G	A	missense_variant	S	1	p.Glu484Lys
23403	A	G	missense_variant	S	0.994565	p.Asp614Gly
28144	T	C	missense_variant	ORF8	0.984906	p.Leu84Ser
							N676_I8555_P1-SARS-CoV-2-E484K_plus_D614G_TruSeq-AD018_GTCCGC_S9

## Sheet: N676_I8551_P0-SARS-CoV-2-N501Y_
POS	REF	ALT	EFFECT	GENE	VAF	PROTEIN	filename
7486	A	T	synonymous_variant	ORF1ab	1	p.Ser2407Ser
7489	T	A	synonymous_variant	ORF1ab	0.994475	p.Thr2408Thr
8782	C	T	synonymous_variant	ORF1ab	1	p.Ser2839Ser
23063	A	T	missense_variant	S	1	p.Asn501Tyr
23403	A	G	missense_variant	S	0.993174	p.Asp614Gly
28144	T	C	missense_variant	ORF8	1	p.Leu84Ser
							N676_I8551_P0-SARS-CoV-2-N501Y_plus_D614G_TruSeq-AD006_GCCAAT_S5

## Sheet: N676_I8552_P0-SARS-CoV-2-del69-
POS	REF	ALT	EFFECT	GENE	VAF	PROTEIN	filename
7486	A	T	synonymous_variant	ORF1ab	1	p.Ser2407Ser
7489	T	A	synonymous_variant	ORF1ab	0.988166	p.Thr2408Thr
8782	C	T	synonymous_variant	ORF1ab	0.993378	p.Ser2839Ser
21764	ATACATG	A	disruptive_inframe_deletion	S	0.917874	p.His69_Val70del
23063	A	T	missense_variant	S	1	p.Asn501Tyr
23403	A	G	missense_variant	S	0.991968	p.Asp614Gly
28144	T	C	missense_variant	ORF8	0.99422	p.Leu84Ser
							N676_I8552_P0-SARS-CoV-2-del69-70_plus_N501Y_plus_D614G_TruSeq-AD012_CTTGTA_S6

## Sheet: N676_I8549_P0-SARS-CoV-2-K417N_
POS	REF	ALT	EFFECT	GENE	VAF	PROTEIN	filename
7486	A	T	synonymous_variant	ORF1ab	1	p.Ser2407Ser
7489	T	A	synonymous_variant	ORF1ab	1	p.Thr2408Thr
8782	C	T	synonymous_variant	ORF1ab	1	p.Ser2839Ser
22813	G	T	missense_variant	S	1	p.Lys417Asn
23403	A	G	missense_variant	S	1	p.Asp614Gly
28144	T	C	missense_variant	ORF8	0.994152	p.Leu84Ser
							N676_I8549_P0-SARS-CoV-2-K417N_plus_D614G_TruSeq-AD004_TGACCA_S3

## Sheet: N676_I8553_P0-SARS-CoV-2-B1.1.7
POS	REF	ALT	EFFECT	GENE	VAF	PROTEIN	filename
241	C	T	upstream_gene_variant		0.994413
913	C	T	synonymous_variant	ORF1ab	1	p.Ser216Ser
3037	C	T	synonymous_variant	ORF1ab	1	p.Phe924Phe
3177	C	T	missense_variant	ORF1ab	1	p.Pro971Leu
3267	C	T	missense_variant	ORF1ab	0.996016	p.Thr1001Ile
5388	C	A	missense_variant	ORF1ab	0.994413	p.Ala1708Asp
5986	C	T	synonymous_variant	ORF1ab	1	p.Phe1907Phe
6954	T	C	missense_variant	ORF1ab	1	p.Ile2230Thr
11287	GTCTGGTTTT	G	conservative_inframe_deletion	ORF1ab	0.931818	p.Ser3675_Phe3677del
11291	G	A	missense_variant	ORF1ab	1	p.Gly3676Ser
11296	T	G	missense_variant	ORF1ab	0.565217	p.Phe3677Leu
14408	C	T	synonymous_variant	ORF1ab	1	p.Leu4715Leu
14676	C	T	missense_variant	ORF1ab	1	p.Pro4804Leu
15279	C	T	missense_variant	ORF1ab	0.994595	p.Thr5005Ile
16176	T	C	missense_variant	ORF1ab	0.987705	p.Leu5304Pro
21764	ATACATG	A	disruptive_inframe_deletion	S	0.973094	p.His69_Val70del
21990	TTTA	T	disruptive_inframe_deletion	S	0.931677	p.Tyr145del
23063	A	T	missense_variant	S	1	p.Asn501Tyr
23271	C	A	missense_variant	S	1	p.Ala570Asp
23403	A	G	missense_variant	S	0.99635	p.Asp614Gly
23604	C	A	missense_variant	S	1	p.Pro681His
23709	C	T	missense_variant	S	0.984211	p.Thr716Ile
24506	T	G	missense_variant	S	1	p.Ser982Ala
24914	G	C	missense_variant	S	0.987261	p.Asp1118His
27972	C	T	stop_gained	ORF8	0.993671	p.Gln27*
28048	G	T	missense_variant	ORF8	0.988506	p.Arg52Ile
28111	A	G	missense_variant	ORF8	1	p.Tyr73Cys
28270	TA	T	upstream_gene_variant		0.895
28280	G	C	missense_variant	N	1	p.Asp3His
28281	A	T	missense_variant	N	0.988889	p.Asp3Val
28282	T	A	missense_variant	N	0.891089	p.Asp3Glu
28881	G	A	missense_variant	N	1	p.Arg203Lys
28882	G	A	synonymous_variant	N	1	p.Arg203Arg
28883	G	C	missense_variant	N	0.925311	p.Gly204Arg
28977	C	T	missense_variant	N	0.995763	p.Ser235Phe
							N676_I8553_P0-SARS-CoV-2-B.1.1.7-0112_TruSeq-AD014_AGTTCC_S7

[truncated: 21 more sheets: N676_I8559_P1-SARS-CoV-2-E484K_, N676_I8556_P1-SARS-CoV-2-N501Y_, I8573_SARS_CoV_2_3_P0_B1.1.7, I8574_SARS_CoV_2_4_P1_B.1.1.7, I8576_SARS_CoV_2_6_P1_B1.1.7_8X, I8575_SARS_CoV_2_5_P1_B1.17_TMP, I8577_SARS_CoV_2_7_P1_SA_3X, I8578_SARS_CoV_2_8_P1_SA_7X, I8579_SARS_CoV_2_9_P0_UK_8X, I8580_SARS_CoV_2_10_P0_SA_7X, I8581_SARS_CoV_2_11_P0_SA_3X, I8582_SARS_CoV_2_12_P1_D614G, I8583_SARS_CoV_2_13_P1_SA_3X_TM, I8584_SARS_CoV_2_14_P2_D614G_TM, I8585_SARS_CoV_2_15_P2_K417N_D6, I8586_SARS_CoV_2_16_P1_SA_7X_TM, I8587_SARS_CoV_2_17_P2_K417N_D6, I8588_SARS_CoV_2_18_P2_E484K_N5, I8589_SARS_CoV_2_19_P1_UK_8X_TM, I8590_SARS_CoV_2_20_P2_E484K_N5 …]
